# Supplementary material for: Electrophoretic assisted fabrication of additive-free WS2 nanosheet anodes for high energy density lithium-ion batteries
Source: Royal Society of Chemistry journal article supplement (doi:10.1039/d4nr03025g), 2024-01-01
Supplement: d4nr03025g1.pdf [file d4nr03025g1.pdf]

## Electronic supplementary information

### Electrophoretic assisted Fabrication of Additive-free WS<sub>2</sub> Nanosheet Anodes for High Energy Density Lithium-Ion Batteries

*Xuan-Manh Pham,<sup>‡</sup> Niraj Nitish Patil,<sup>‡</sup> Syed Abdul Ahad, Nilotpal Kapuria, Kwadwo Asare Owusu, Hugh Geaney, Shalini Singh, Kevin M. Ryan\**

Department of Chemical Sciences and Bernal Institute, University of Limerick, Limerick, V94 T9PX, Ireland

E-mail: [Kevin.M.Ryan@ul.ie](mailto:Kevin.M.Ryan@ul.ie)

<sup>‡</sup> Xuan-Manh Pham and Niraj Nitish Patil have contributed equally to this work.

#### Experimental section

##### Materials

Tungsten hexacarbonyl (W(CO)<sub>6</sub>, 97%), oleylamine (OLA, 70%), squalane (96%), oleic acid (OA, 90%), phenyl disulphide (99%), and trioctylphosphine (TOP, 97%) were purchased from Sigma Aldrich. Toluene, ethanol, hexane, and isopropanol (IPA) were bought from Lennox, Ireland. Tetradecyl phosphonic acid (TDPA) was purchased from Plasmachem. All reagents were used as received without further purification. Cu foil (9 μm thick) was provided by Pi-Kem. Battery-grade 1.0 M LiPF<sub>6</sub> in ethylene carbonate (EC) and diethyl carbonate (DEC), EC-DEC (1:1 v/v) and vinylene carbonate (VC, 97 %, additives) were purchased from Sigma Aldrich.

##### Synthesis

Two different WS<sub>2</sub> NSs were prepared, with control over crystal phase and particle morphology, using a colloidal hot injection setup described in our recent work.<sup>1</sup> Firstly,

semiconducting WS<sub>2</sub> NSs (denoted NS-2H) were synthesized by adding oleylamine, OLA (7 mL) into a 25 mL three-neck flask. The solution was evacuated at 120°C for 30 minutes to remove all moisture and oxygen. At the same time, W stock solution (W(CO)<sub>6</sub> (0.25 mmol), oleic acid (2 mL) and 10 mol% of tetradecyl phosphonic acid (TDPA)) and S stock solution (1 mmol of S in 5 mL of oleylamine, OLA) were prepared separately inside the glovebox under vigorously stirred at 130 °C until W(CO)<sub>6</sub> and S completely dissolved in solution, then both solutions were mixed in an oxygen and moisture-free atmosphere at 130 °C. Afterwards, the reaction vessel was heated to 320 °C under an Ar atmosphere, at which point a mixture of W stock solution and S stock solution was injected into the flask at a rate of ~0.7 ml min<sup>-1</sup>. The reaction mixture was kept at 320 °C for 2 h. The NSs were washed twice with a mixture of 10 ml toluene and 10 ml ethanol the first time and a mixture of 5 ml hexane and 5 ml IPA the second time at 5,000 rpm for 5 min. The supernatants were discarded and the NSs were collected and redispersed into 5 mL hexane for further experiments. For metallic NS synthesis (denoted NS-1T'), the above procedure was replicated but squalene was substituted for OLA (2 mL) in the preparation of S stock solution, WCl<sub>6</sub> replaced W(CO)<sub>6</sub> in the preparation of W stock solution, and OA was added initially into a 25 mL three-neck flask instead of OLA.

**Electrophoretic Deposition.** The deposition solution was prepared by diluting 0.4 mL of the as-synthesized NSs in hexane solution with 10 mL hexane. Two Cu foil plates held approximately 2 cm apart were immersed in the bath, and a direct current (DC) voltage of 300 V was applied using a high-voltage power supply (TECHNIX SR-5-F-300). Deposition of NSs occurred on the positive electrode, and the thickness of the resulting film could be controlled by varying the concentration and total immersion time. All battery electrodes achieved a mass loading of 0.4–0.5 mg/cm<sup>2</sup>.

**Ligand Removal.** The resultant films typically included long-chain organic ligands (OLA and OA, TDPA) which are low conductivity. Removal of these ligands not only enhances film

conductivity but also reduces inactive material.<sup>2, 3</sup> The electrodes underwent this treatment by being submerged in a 20 mM solution of ammonium sulfide in methanol for 30 s, followed by a methanol rinse to remove any residual ammonium sulfide and any free organics. Afterwards, the electrodes were dried for 12 h at 70 °C before the cell assembly.

### **Material characterisation**

Transmission electron microscopy (TEM) and dark-field scanning transmission electron microscopy (DF-STEM) were obtained on a JEOL JEM-2100F field emission microscope at an acceleration voltage of 200 kV, equipped with a Gatan Ultra Scan CCD camera and an EDAX Genesis energy dispersive X-ray spectroscopy (EDS) detector. Raman spectroscopy was carried out with a Horiba Labraman 300 spectrometer system equipped with a 532 nm laser. UV-Vis-NIR spectroscopy was performed on a Cary 5000 spectrophotometer in 1 cm path length cuvettes using toluene as solvent. X-ray photoelectron spectroscopy (XPS) was collected on a Kratos AXIS ULTRA spectrometer using a mono Al K $\alpha$  X-ray gun.

### **Electrochemical characterization**

Half-cells (CR 2032) were assembled in an argon filled glove box (Vigor) containing an active electrode, Li metal foil as a counter electrode, and a polypropylene separator (Celgard 2400) soaked in electrolyte. The electrolyte solution was 1 M LiPF<sub>6</sub> (EC:DEC, 50:50 v/v) + 3% VC (Sigma Aldrich). Galvanostatic cycling tests were carried out using a Neware battery cycler instrument in a potential range of 0.01–3.0 V. All current densities were calculated based on the mass of the active material. Electrochemical impedance spectroscopy (EIS) was performed in a frequency range of 0.1 Hz to 10 kHz, and cyclic voltammetry (CV) was performed using a scan rate of 0.05 mV s<sup>-1</sup>.

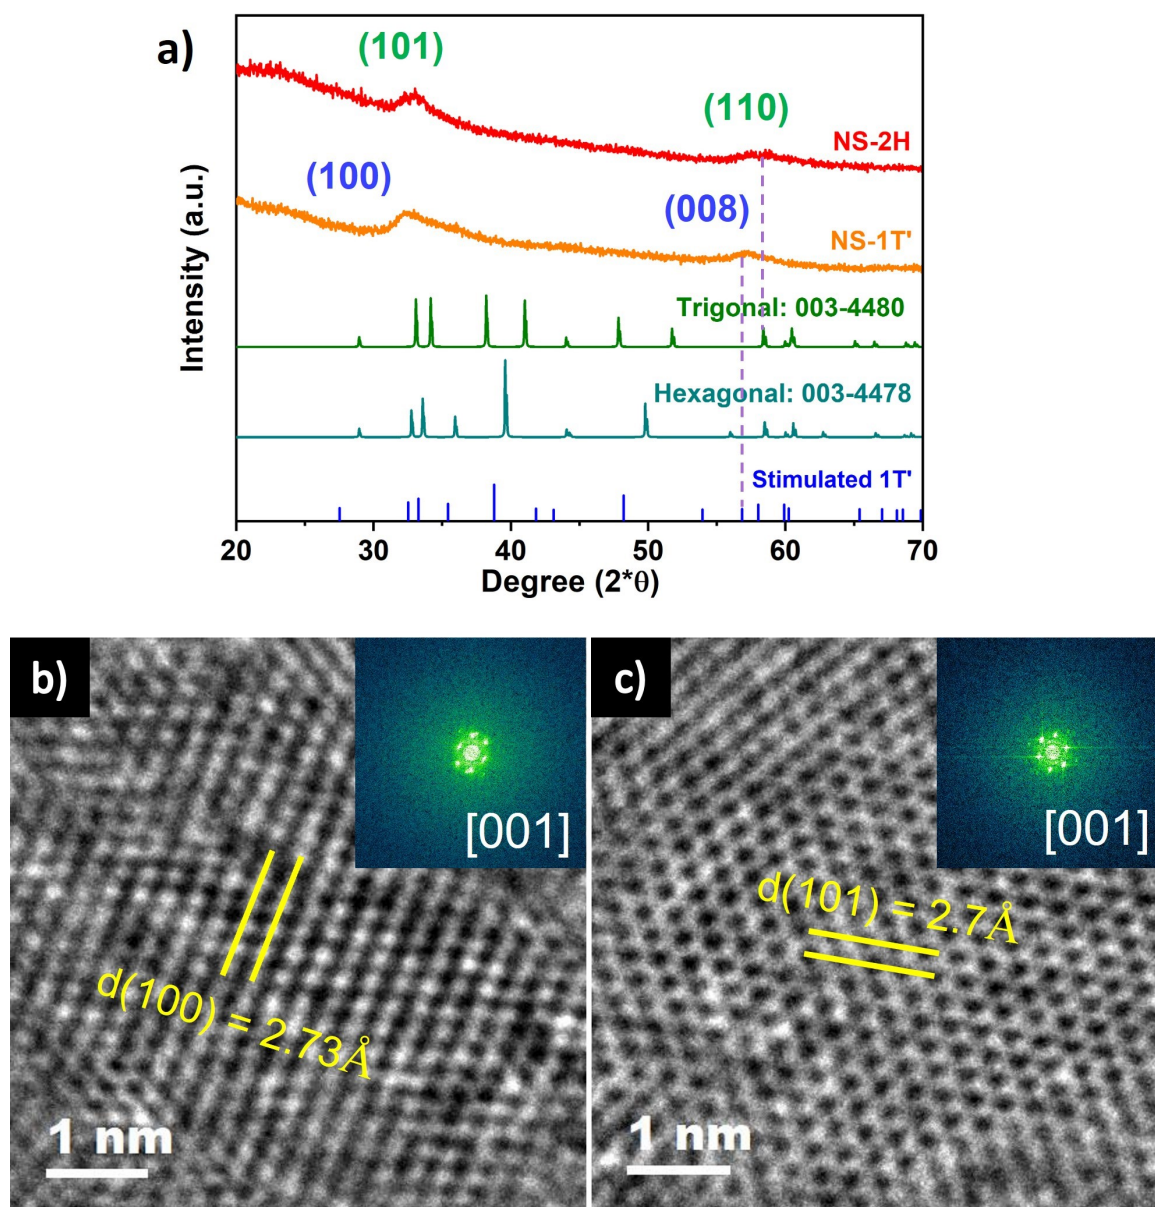

**Fig. S1** a) XRD pattern of NS-1T' and NS-2H. HR-TEM images of b) NS-1T' with FFT inset and c) NS-2H with FFT inset.

The XRD analysis confirmed the presence of 1T' phase and 2H phase in NS-1T' and NS-2H samples, respectively. The XRD pattern of NS-2H (red) matched with standard pattern (003-4480) with peaks at  $\sim 33.0^\circ$  and  $58.3^\circ$  characteristic of trigonal structure (2H phase), assigned to (101) and (110) planes, respectively. The XRD pattern of NS-1T' occurred two peaks at  $\sim 32.5^\circ$  and  $57.1^\circ$ , matched with hexagonal standard pattern (003-4478) and stimulated 1T' pattern.

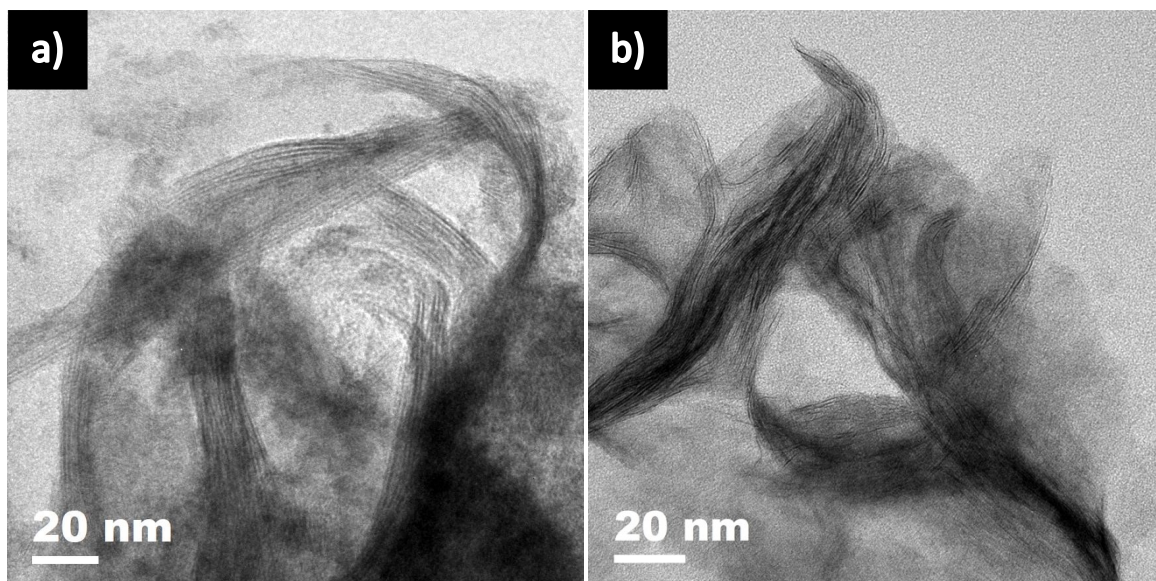

**Fig. S2** HR-TEM images of a) NS-1T' and b) NS-2H.

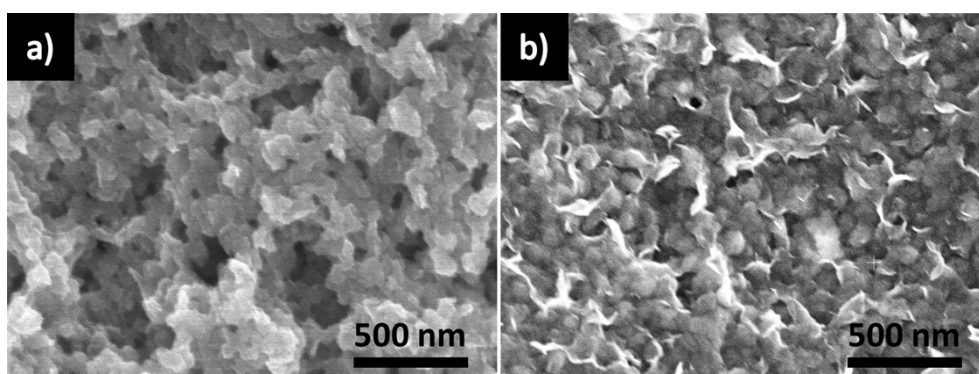

**Fig. S3** HR-SEM images of a) NS-1T' and b) NS-2H deposited by EPD.

NS-1T' (Fig. S3a) and NS-2H (Fig. S3b) were deposited uniformly by EPD on copper foils. Nanosheets (NSs) were arranged randomly, creating space sites that enable electrolytes to immerse easily into the electrodes. This facilitates the  $\text{Li}^+$  diffusion and improves the electrical conductivity.

**Table S1** Comprehensive comparison table for WS<sub>2</sub> as anode material.

| Anode Material                                                     | Capacity retention (mA h g <sup>-1</sup> ) | No. of Cycles | Current Density (mA g <sup>-1</sup> ) | Rate Performance Capacity @ Current Density (mA h g <sup>-1</sup> @mA g <sup>-1</sup> ) | References                                                         |
|--------------------------------------------------------------------|--------------------------------------------|---------------|---------------------------------------|-----------------------------------------------------------------------------------------|--------------------------------------------------------------------|
| WS <sub>2</sub> NS-2H                                              | 579                                        | 600           | ~86.6                                 | 652 @ 43.3<br>511 @ 433<br>411 @ 866<br>272 @ 2165                                      | This work                                                          |
| WS <sub>2</sub> @HNCSs                                             | 631.6                                      | 150           | ~500                                  | 801.4 @ 100<br>545.6 @ 2000                                                             | ACS Appl. Mater. Interfaces 2016, 8, 29, 18841–18848. <sup>4</sup> |
| 2H-WS <sub>2</sub>                                                 | ~275                                       | 100           | 800                                   | 457 @ 100<br>438 @ 200<br>421 @ 300<br>295 @ 800                                        | Nano Lett. 2018, 18, 11, 7155–7164. <sup>5</sup>                   |
| WS <sub>2</sub> /carbon nanofibers (WS <sub>2</sub> /CNFs)         | 458                                        | 100           | 1000                                  | 770 @ 100<br>635 @ 200<br>554 @ 500<br>495 @ 1000                                       | Sci. Bull. 2016, 61, 3, 227–235. <sup>6</sup>                      |
| WS <sub>2</sub> @TiNb <sub>2</sub> O <sub>7</sub> HNPs             | 627                                        | 200           | 1000                                  | 660 @ 200<br>632 @ 500<br>578 @ 2000<br>527 @ 4000                                      | Chem. Eng. J., 2020, 382, 122800. <sup>7</sup>                     |
| WS <sub>2</sub> -PCBM/MWCNT                                        | 485.73                                     | 500           | 1000                                  | 816.60 @ 200<br>539.94 @ 500<br>343.68 @ 1000<br>187.88 @ 2000                          | Energy Fuels, 2023, 37, 20, 16105–16118. <sup>8</sup>              |
| WS <sub>2</sub> /graphene nanosheets (WS <sub>2</sub> /GNSs)       | 705                                        | 200           | 250                                   | -                                                                                       | Tungsten, 2024, 6, 124–133. <sup>9</sup>                           |
| WS <sub>2</sub> NS                                                 | 242                                        | 600           | 433                                   | 615.02 @ 108<br>550.82 @ 216<br>450.27 @ 433<br>336.84 @ 866                            | Energy Technol. 2022, 10, 2200117. <sup>10</sup>                   |
| C@WS <sub>2</sub> @Gs                                              | 356.5                                      | 150           | 100                                   | 587.1 @ 200<br>535.6 @ 500<br>415.5 @ 1000<br>217.8 @ 2000                              | Chem. Eng. J., 2019, 375, 122033. <sup>11</sup>                    |
| WS <sub>2</sub> /graphene/carbon nanofiber (WS <sub>2</sub> /GCNF) | 1128.2                                     | 100           | 100                                   | -                                                                                       | Nanoscale, 2016, 8, 16387–16394. <sup>12</sup>                     |
| Hexagonal WS <sub>2</sub> nanosheets ((750 °C))                    | 241                                        | 20            | 433                                   | 350 @ 866<br>250 @ 2165                                                                 | New J. Chem., 2020, 44, 1594–1608. <sup>13</sup>                   |
| Plate-like WS <sub>2</sub>                                         | ~380                                       | 200           | ~108                                  | 486 @ 54<br>449.6 @ 216<br>390.7 @ 433<br>334.7 @ 866                                   | ChemistrySelect 2020, 5, 14183 – 14189. <sup>14</sup>              |

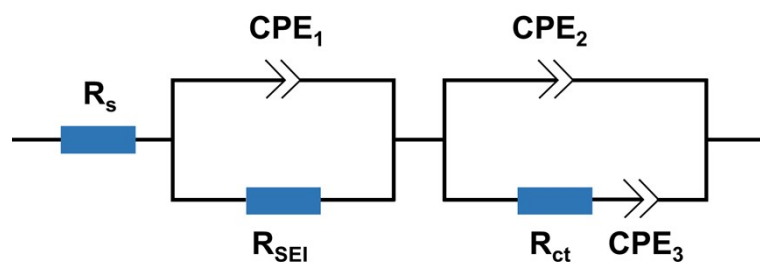

**Fig. S4** An equivalent circuit used for fitting of EIS data.

The equivalent circuit contains  $R_s$  which is the resistance of electrolyte.  $R_{SEI}$  stands for the resistance of the SEI layer.  $R_{ct}$  is associated with the charge transfer resistance.  $CPE_1$ ,  $CPE_2$ , and  $CPE_3$  are the capacitance (constant phase element of SEI layer, the electrode/electrolyte interface).

**Table S2** Tabulation of  $R_s$ ,  $R_{SEI}$  and  $R_{ct}$  value of NS-1T' and NS-2H at different cycle no. cycled.

| Electrode | NS-1T'             |                        |                       | NS-2H              |                        |                       |
|-----------|--------------------|------------------------|-----------------------|--------------------|------------------------|-----------------------|
| Cycle     | $R_s$ ( $\Omega$ ) | $R_{SEI}$ ( $\Omega$ ) | $R_{ct}$ ( $\Omega$ ) | $R_s$ ( $\Omega$ ) | $R_{SEI}$ ( $\Omega$ ) | $R_{ct}$ ( $\Omega$ ) |
| 1st       | 99.92              | 37.87                  | 2317                  | 26.2               | 30.2                   | 1110                  |
| 10th      | 73.88              | 39.43                  | 1764                  | 28.97              | 30.74                  | 899.2                 |
| 100th     | 60.93              | 41.48                  | 1490                  | 17.77              | 32.66                  | 701.2                 |

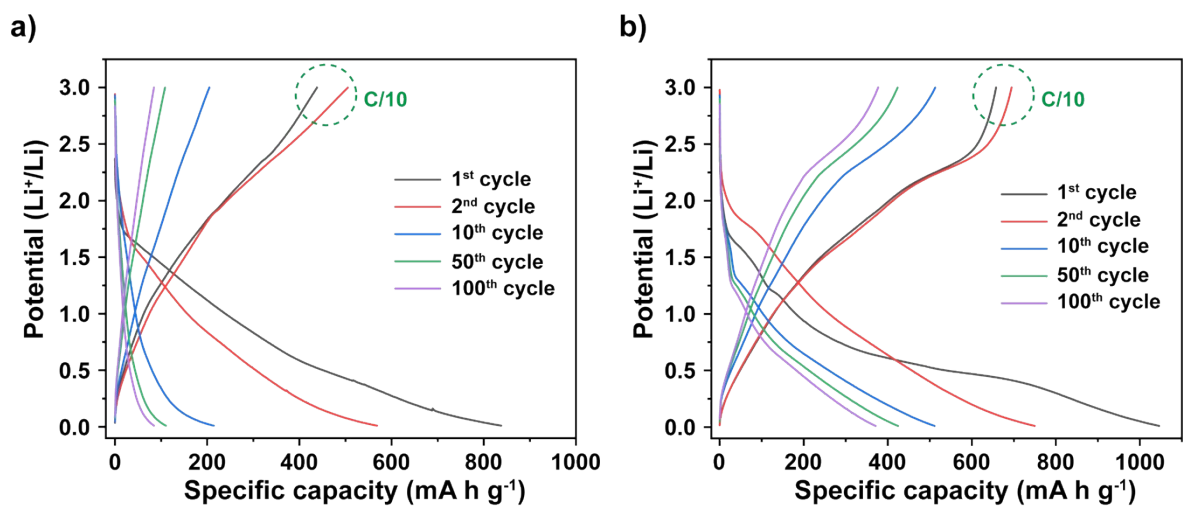

**Fig. S5** Charge-discharge profiles of a) NS-1T' and b) NS-2H cycled at a rate of C/10 for the first 5 cycles and 1C thereafter.

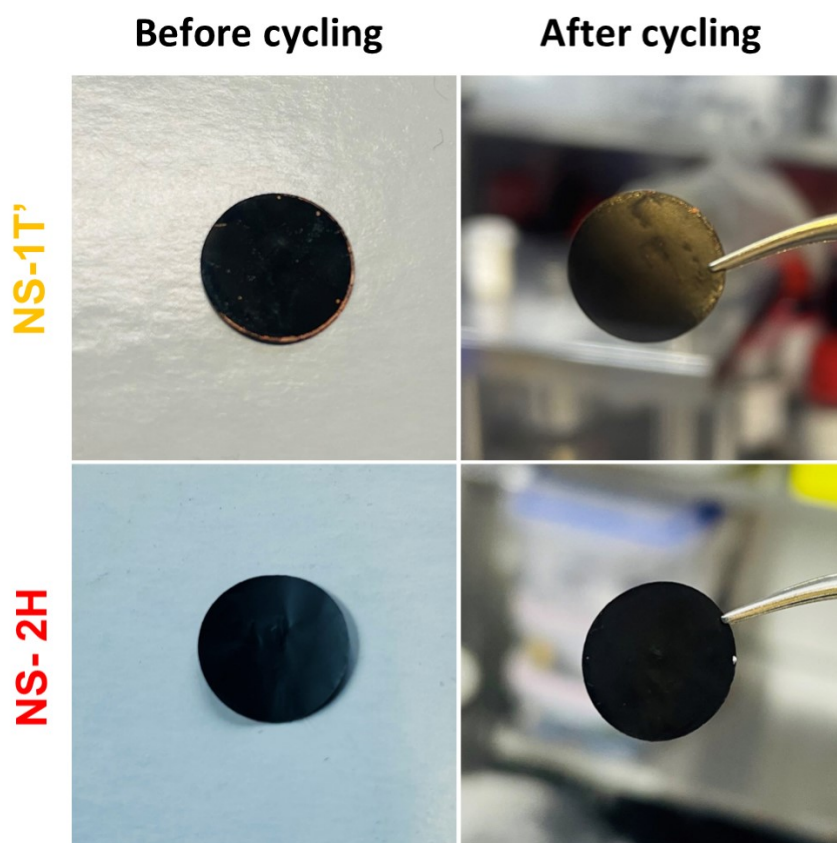

**Fig. S6** Optical images of NS-1T' and NS-2H electrodes before and after cycling 100 cycles.



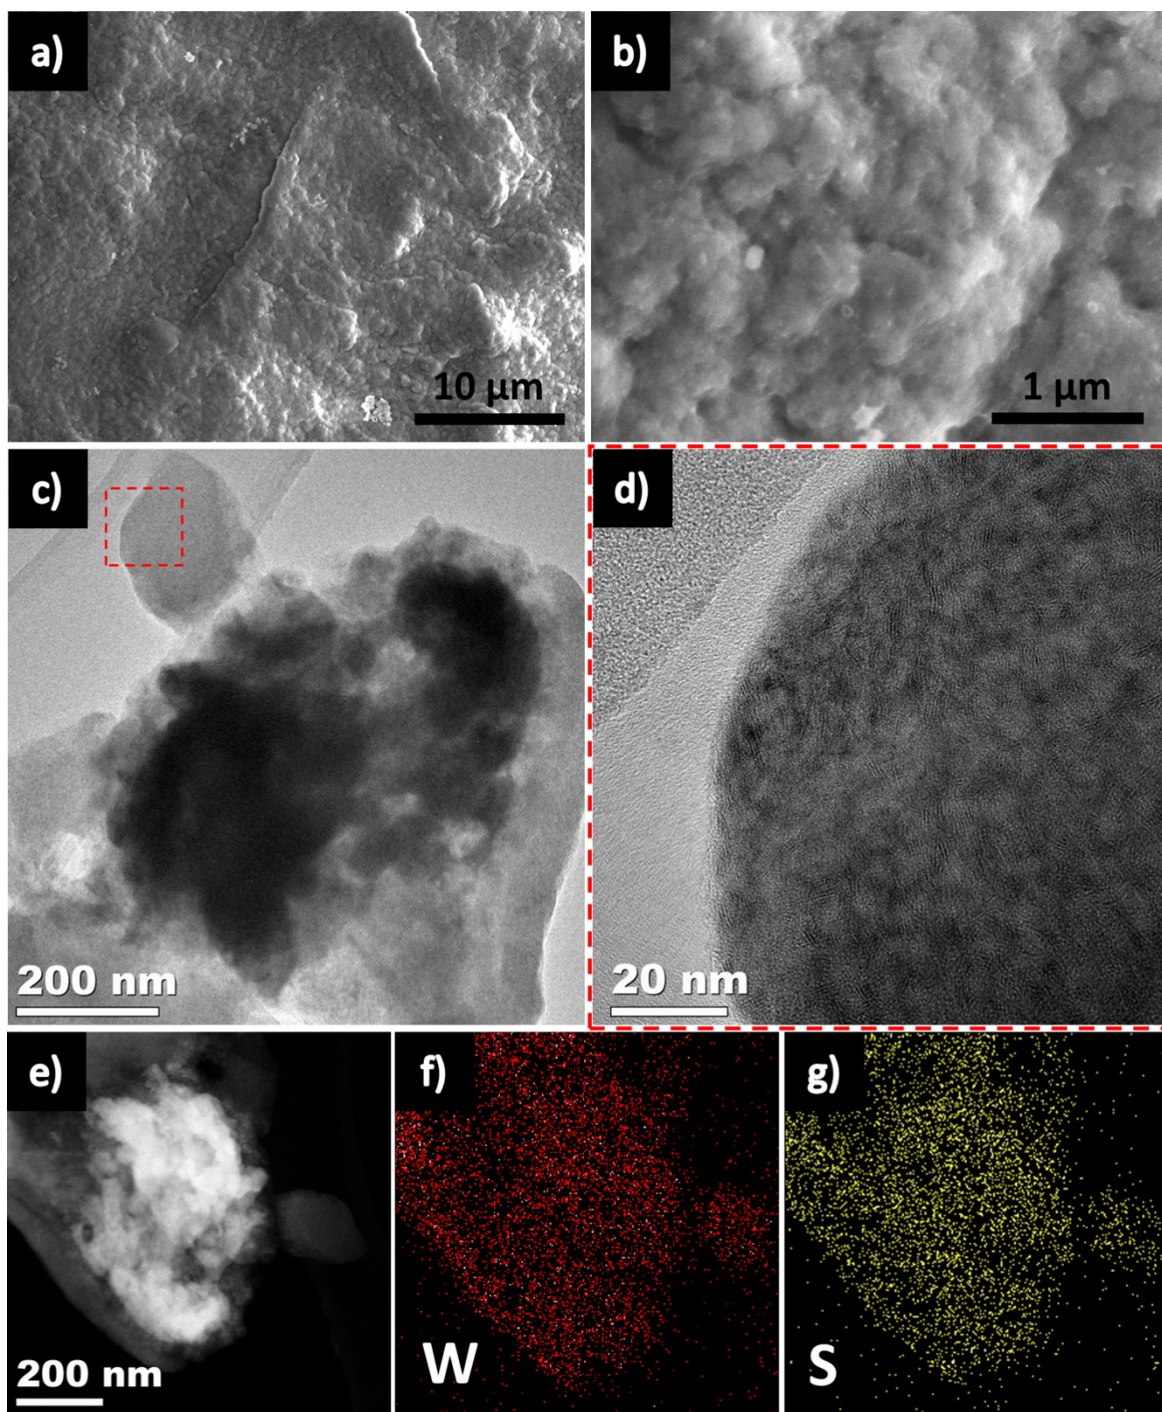

**Fig. S7** Post mortem of the NS-1T' after 100 cycles: (a and b) SEM images, (c and d) TEM images, (e) STEM and (f and g) elemental mapping of W and S of NS-1T', respectively.

**Further post-mortem HRTEM analysis:**

**2H phase WS<sub>2</sub> after 100 cycling:**

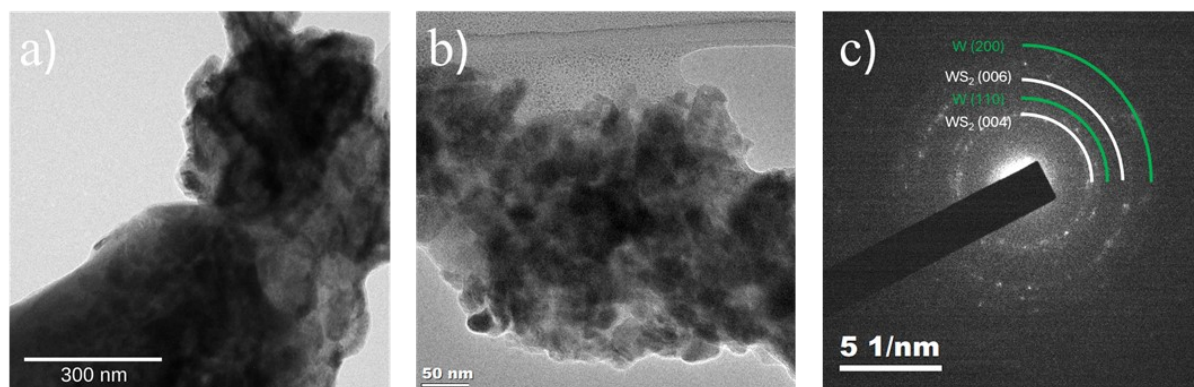

**Fig. S8** a) and b) Low and high-resolution TEM images of NS-2H after 100 cycles. c) SAED pattern of NS-2H after 100 cycles, indicating the presence of crystalline WS<sub>2</sub> along with W nanoparticles.

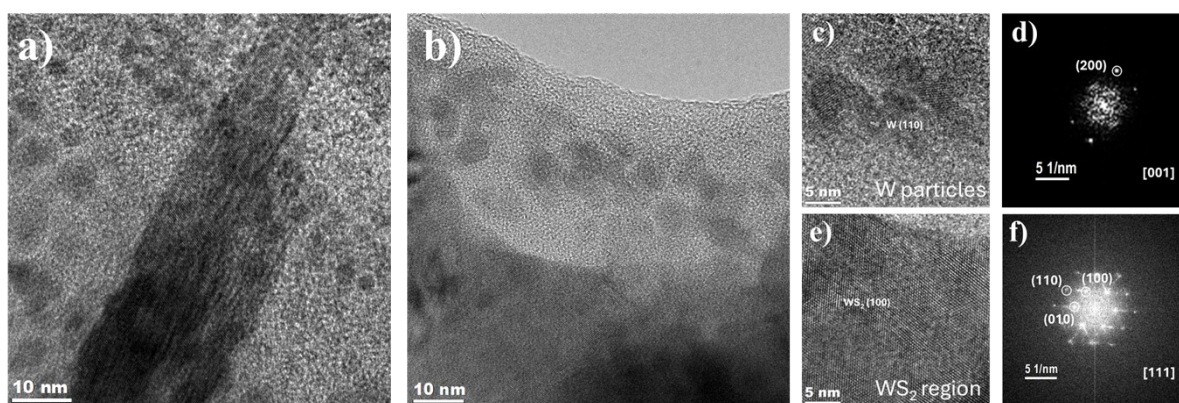

**Fig. S9** a) and b) High-resolution TEM images of NS-2H after 100 cycles, showing the presence of both crystalline WS<sub>2</sub> nanosheets and W nanoparticles. c) and d) High-resolution TEM images of the region from figure b), highlighting W nanoparticles, with FFT confirming the crystalline structure of W. e) and f) High-resolution TEM images of the region from figure b), focusing on WS<sub>2</sub> nanosheets, with FFT corresponding to the WS<sub>2</sub> crystal structure.

**1T' phase WS<sub>2</sub> after 100 cycling:**

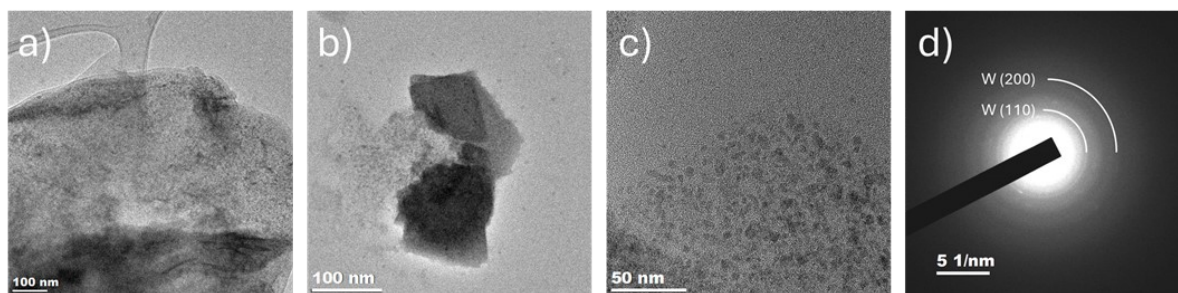

**Fig. S10** a) and b) Low-resolution TEM images of NS-1T' after 100 cycles, showing that most of the WS<sub>2</sub> has converted into an amorphous phase. c) High-resolution TEM image of NS-1T' after 100 cycles, showing the presence of W nanoparticles. d) SAED pattern of NS-1T' after 100 cycles, indicating the presence of amorphous WS<sub>2</sub> along with W nanoparticles.

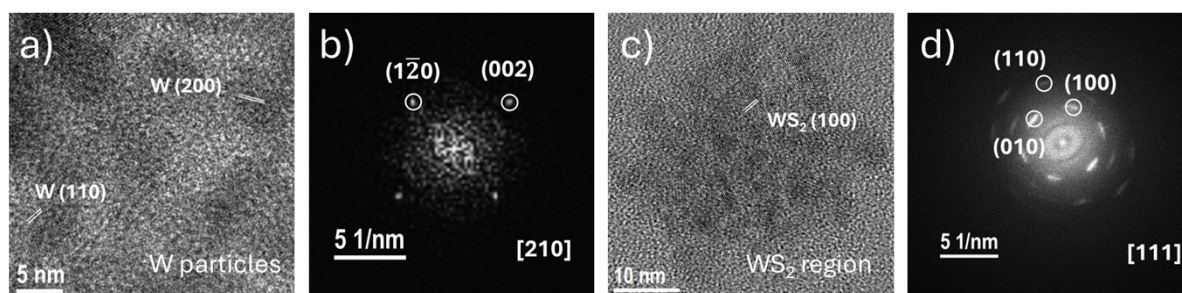

**Fig. S11** a) and b) High-resolution TEM images of W nanoparticles, with FFT analysis confirming the crystalline structure of W. c) and d) High-resolution TEM images of WS<sub>2</sub> nanosheets, showing fragmentation, with FFT corresponding to the WS<sub>2</sub> crystal structure.

## References

1. N. Kapuria, N. N. Patil, A. Sankaran, F. Laffir, H. Geaney, E. Magner, M. Scanlon, K. M. Ryan and S. Singh, *J. Mater. Chem. A*, 2023, **11**, 11341-11353.
2. H. Zhang, B.-R. Hyun, F. W. Wise and R. D. Robinson, *Nano Lett.*, 2012, **12**, 5856-5860.
3. D.-H. Ha, T. Ly, J. M. Caron, H. Zhang, K. E. Fritz and R. D. Robinson, *ACS Appl. Mater. Interfaces*, 2015, **7**, 25053-25060.
4. X. Zeng, Z. Ding, C. Ma, L. Wu, J. Liu, L. Chen, D. G. Ivey and W. Wei, *ACS Appl. Mater. Interfaces*, 2016, **8**, 18841-18848.
5. S. Bellani, F. Wang, G. Longoni, L. Najafi, R. Oropesa-Nuñez, A. E. Del Rio Castillo, M. Prato, X. Zhuang, V. Pellegrini, X. Feng and F. Bonaccorso, *Nano Lett.*, 2018, **18**, 7155-7164.
6. S. Zhou, J. Chen, L. Gan, Q. Zhang, Z. Zheng, H. Li and T. Zhai, *Sci. Bull.*, 2016, **61**, 227-235.
7. L. Yin, D. Pham-Cong, I. Jeon, J.-P. Kim, J. Cho, S.-Y. Jeong, H. Woo Lee and C.-R. Cho, *Chem. Eng. J.*, 2020, **382**, 122800.
8. B. Mondal, A. Azam and S. Ahmad, *Energy & Fuels*, 2023, **37**, 16105-16118.
9. Y.-L. Wu, J.-B. Hong, W.-X. Zhong, C.-X. Wang, Z.-F. Li and S. Dmytro, *Tungsten*, 2024, **6**, 124-133.
10. S. Sengupta and M. Kundu, *Energy Technology*, 2022, **10**, 2200117.
11. I. Kim, S.-W. Park and D.-W. Kim, *Chem. Eng. J.*, 2019, **375**, 122033.
12. L. Zhang, W. Fan and T. Liu, *Nanoscale*, 2016, **8**, 16387-16394.
13. P. Sharma, A. Kumar, S. Bankuru, J. Chakraborty and S. Puravankara, *New J. Chem.*, 2020, **44**, 1594-1608.
14. S. Sengupta and M. Kundu, *ChemistrySelect*, 2020, **5**, 14183-14189.
